# Supplementary material for: Survival impact of pre-treatment neutrophils on oropharyngeal and laryngeal cancer patients undergoing definitive radiotherapy
Source: Springer Nature journal article supplement (doi:10.1186/s12967-017-1268-7), 2017-08-02
Supplement: MOESM1 [file 13345432]

**Supplementary 1.** Outcomes by Raw Difference in Neutrophil Count from Pre-Treatment to Post-Treatment (n=196)

| Outcome Measure          | Univariate Analysis |           |          |
|--------------------------|---------------------|-----------|----------|
|                          | HR                  | 95%CI     | <i>p</i> |
| Overall Survival         |                     |           |          |
| Continuous               | 0.97                | 0.78-1.21 | 0.78     |
| Cancer Specific Survival |                     |           |          |
| Continuous               | 1.05                | 0.82-1.35 | 0.68     |
| Local Control            |                     |           |          |
| Continuous               | 0.84                | 0.66-1.07 | 0.16     |
| Distant Control          |                     |           |          |
| Continuous               | 1.07                | 0.81-1.41 | 0.66     |

| Supplementary Table 2. Multivariate Predictors of Overall Survival |              |            |       |
|--------------------------------------------------------------------|--------------|------------|-------|
| Variable                                                           | Multivariate |            |       |
|                                                                    | HR           | 95% CI     |       |
| Age at Diagnosis                                                   |              |            |       |
| ≤ 60                                                               | 1            |            |       |
| > 60                                                               | 0.83         | 0.39-1.74  | 0.62  |
| Primary Site                                                       |              |            |       |
| Oropharynx                                                         | 1            |            |       |
| Larynx                                                             | 0.74         | 0.28-1.98  | 0.55  |
| Gender                                                             |              |            |       |
| Male                                                               | 1            |            |       |
| Female                                                             | 0.38         | 0.12-1.24  | 0.11  |
| Race                                                               |              |            |       |
| White                                                              | 1            |            |       |
| Other                                                              | 1.08         | 0.39-2.96  | 0.89  |
| Tobacco Use (pack years)                                           |              |            |       |
| < 10                                                               | 1            |            |       |
| ≥ 10                                                               | 2.4          | 1.08-5.34  | 0.03  |
| Karnofsky Performance Score                                        |              |            |       |
| > 80                                                               | 1            |            |       |
| ≤ 80                                                               | 1            | 0.46-2.19  | 1.00  |
| T-stage                                                            |              |            |       |
| T1-2                                                               | 1            |            |       |
| T3                                                                 | 2.02         | 0.92-4.44  | 0.08  |
| T4                                                                 | 3.9          | 1.60-9.48  | <0.01 |
| N-stage                                                            |              |            |       |
| N0-1                                                               | 1            |            |       |
| N2a-2b                                                             | 1.14         | 0.47-2.73  | 0.78  |
| N2c-3                                                              | 0.23         | 0.06-0.86  | 0.03  |
| Post-Operative Radiation                                           |              |            |       |
| Yes                                                                | 1            |            |       |
| No                                                                 | 0.83         | 0.34-2.00  | 0.67  |
| HPV                                                                |              |            |       |
| Negative                                                           | 1            |            |       |
| Positive                                                           | 0.31         | 0.12-0.77  | 0.01  |
| Unknown                                                            | 0.34         | 0.12-0.93  | 0.04  |
| Chemotherapy                                                       |              |            |       |
| No                                                                 | 1            |            |       |
| Yes                                                                | 4.93         | 0.96-25.45 | 0.06  |
| Pre-Treatment Neutrophil Count                                     |              |            |       |
| Continuous                                                         | 1.28         | 1.02-1.61  | 0.03  |

Abbreviations: HR, hazard ratio; CI, confidence interval
